# Supplementary material for: Proposed diagnostic criteria for classical chronic myelomonocytic leukemia (CMML), CMML variants and pre-CMML conditions
Source: PubMed Central journal article supplement — Haematologica. 2019 May 2;104(10):1935–49. doi: 10.3324/haematol.2019.222059 (PMC6886439; doi:10.3324/haematol.2019.222059), 2019-10
Supplement: HAEMATOL-2019-222059v2-Valent-01.pdf [file HAEMATOL-2019-222059v2-Valent-01.pdf]

## Classification of CMML, special CMML variants and pre-CMML conditions

### Chronic myelomonocytic leukemia (CMML)

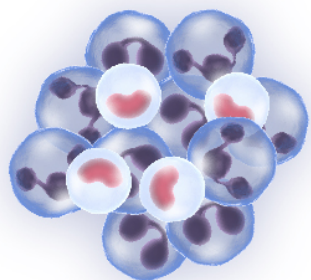

Myeloid neoplasm characterized by

- accumulation of monocytic cells
- abnormal differentiation of the erythroid, granulocytic and/or megakaryocytic lineages
- elevated risk to transform into acute leukemia

### Classification

#### Classical CMML

- Persistent (at least 3 months) absolute PB monocytosis ( $1 \times 10^9/L$ ) and relative monocytosis (10% of PB leukocytes)
- Exclusion of BCR-ABL1+ leukemia and classical myeloproliferative neoplasms (MPN)
- A blast cell count of 0-19% in peripheral blood and/or bone marrow smears

#### CMML variants

Heterogeneous group of neoplasms comprising distinct clinical and biological entities

- Oligomonocytic CMML
- Systemic mastocytosis (SM) with concomitant CMML
- CMML with a concomitant myeloid neoplasm expressing a classical MPN-driver
- CMML with expression of a molecular MPN-driver
- CMML with a concomitant lymphoid/lymphoproliferative neoplasm

#### pre-CMML conditions

- Idiopathic monocytosis of unknown significance (IMUS)
- Clonal monocytosis of unknown significance (CMUS)
- Idiopathic cytopenias of unknown significance (ICUS)
- Clonal cytopenias of unknown significance (CCUS)
